# Supplementary material for: Controllable synthesis of hollow mesoporous silica nanoparticles templated by kinetic self-assembly using a gemini surfactant
Source: Royal Society of Chemistry journal article supplement (doi:10.1039/c3ra22805c), 2013-01-01
Supplement: c3ra22805c.pdf [file c3ra22805c.pdf]

## Supporting Information

### Controllable Synthesis of Hollow Mesoporous Silica Nanoparticles Templated Kinetic Self-Assembly of Gemini Surfactant

Min Li, Chun Zhang<sup>\*</sup>, Xiang-Liang Yang, and Hui-Bi Xu

*College of Life Science and Technology, Huazhong University of Science and Technology, and National Engineering Research Center for Nanomedicine, Wuhan, Hubei, 430074, China.*

<sup>\*</sup>Email: [chunzhang@hust.edu.cn](mailto:chunzhang@hust.edu.cn)

#### 1. Synthesis of mesoporous silica nanoparticles (MSNs)

**General Methods.** Materials obtained commercially were used without further purification. N,N,N',N'-tetramethylethylenediamine (TMEDA) (AR, SCRC), bromotetradecane(AR, Alatin), bromohexadecane(AR, Alatin), bromodecane(AR, Alatin), acetonitrile(AR, SCRC), chloroform(AR), acetone(AR, SCRC), sodium hydroxide(AR, SCRC), tetraethyl orthosilicate (TEOS, 99%, Alfar Aesar). NMR spectra were measured on a Bruker AV400 spectrometer. Field-emission scanning electron microscopy (FE-SEM) images were obtained on a FEI Sirion 200 instrument. Transmission electron microscopy (TEM) images were obtained on a FEI Tecnai G220 instrument. X-Ray powder diffraction (XRD) patterns were recorded on X'Pert PRO X-ray diffractometer with Cu-K radiation with a wavelength of 0.1542 nm. The nitrogen adsorption experiments were performed at 77 K on a Micromeritics ASAP 2020 instrument. Samples were degassed at 573 K for 4 h prior to the measurements.

### **Synthesis of gemini surfactants C<sub>14-2-14</sub> and C<sub>16-2-16</sub>**<sup>S1</sup>

The TMEDA (0.1 mol) and 1-bromotetradecane or 1-Bromo-hexadecane (0.4 mol) were refluxed in MeCN for 2 days. After evaporation, the residue was re-crystallized from CHCl<sub>3</sub>/acetone yielding the C<sub>14-2-14</sub> or C<sub>16-2-16</sub>.

C<sub>14-2-14</sub>: Yield, 80.1%. <sup>1</sup>H NMR (CDCl<sub>3</sub>, 400MHz): δ, 0.88 (t, 6H, *J*=6.8Hz), 1.26-1.38(m, 44H), 1.82(s, 4H), 3.52(s, 12H), 3.71(t, 4H, *J*=8.0Hz), 4.77(s, 4H).

C<sub>16-2-16</sub>: Yield, 69.6%. <sup>1</sup>H NMR (CDCl<sub>3</sub>, 400MHz): δ, 0.88(t, 6H, *J*=7.2Hz), 1.26-1.37(m, 52H), 1.81(s, 4H), 3.49(s, 12H), 3.69(t, 4H, *J*=7.6Hz), 4.60(s, 4H).

### **Synthesis of gemini surfactants C<sub>14-2-10</sub>**<sup>S1</sup>

The TMEDA (0.1 mol) and 1-bromotetradecane (0.08 mol) reacted in MeCN (125 ml) at 40 °C for 3 days. After evaporation and crystallization from Et<sub>2</sub>O, the corresponding pure C<sub>14-2</sub> was isolated in 42.0% yield. C<sub>14-2</sub> (0.1mol) and the 1-bromodecane (4 equiv.) were refluxed in EtOAc (125 ml) for 2 days, and purified by re-crystallization from CHCl<sub>3</sub>/acetone yielding C<sub>14-2-6</sub> in 52.3%.

C<sub>14-2-10</sub>: <sup>1</sup>H NMR (CDCl<sub>3</sub>, 400MHz): δ, 0.88(t, 6H, *J*=7.2Hz), 1.26-1.38(m, 36H), 1.82(s, 4H), 3.52(s, 12H), 3.72(t, 4H, *J*=7.6Hz), 4.78(s, 4H).

### **Synthesis of mesoporous silica nanoparticles(MSNs) templated with C<sub>14-2-14</sub>**

To solution of C<sub>14-2-14</sub> (0.218g) in distilled water (240ml), sodium hydrate solution (2M, 1.75ml) were added at 80 °C and stirred. After a period of pre-assembly time (*t* = 10, 30, 60 and 120 min), TEOS (2.5ml) was dropped slowly into the mixture solution and then kept stirring for 2h. The MSNs were obtained by filtration. Finally, the surfactant template (C<sub>14-2-14</sub>) was removed by refluxing in a mixture of methanol and hydrochloric acid.

### **Synthesis of HMSNs templated with C<sub>14-2-10</sub>**

Following the similar procedure of MSNs templated with C<sub>14-2-14</sub>, used the template of C<sub>14-2-10</sub>, HMSNs were obtained.

### **Synthesis of HMSNs templated with C<sub>16-2-16</sub>**

Following the similar procedure of MSNs templated with C<sub>14-2-14</sub>, used the template of C<sub>16-2-16</sub> with a longer pre-assembly time of *t* = 180 min, HMSNs were obtained.

## 2. Characterization of MSNs templated with C<sub>14-2-14</sub>

### 2.1 TEM images of MSNs templated with C<sub>14-2-14</sub>

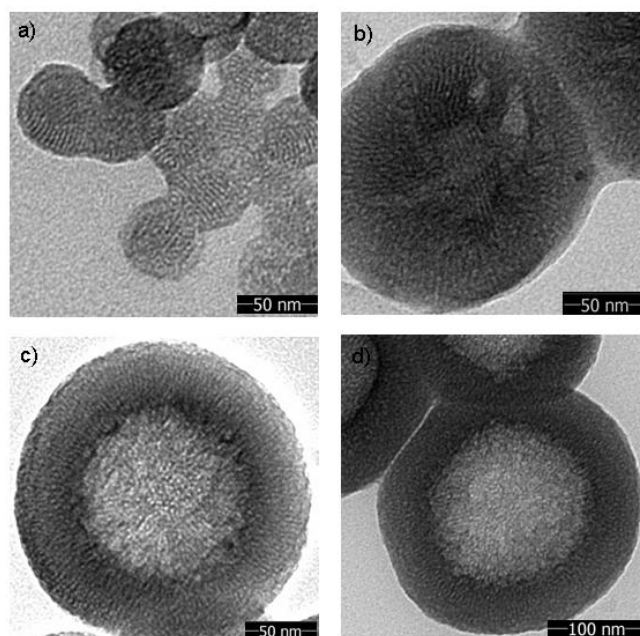

**Fig. S1.** TEM images of MSNs templated with C<sub>14-2-14</sub> from different pre-assembly time of  $t = 10$  min (a), 30 min (b), 60 min (c) and 120 min (d).

### 2.2 SEM images of MSNs templated with C<sub>14-2-14</sub>

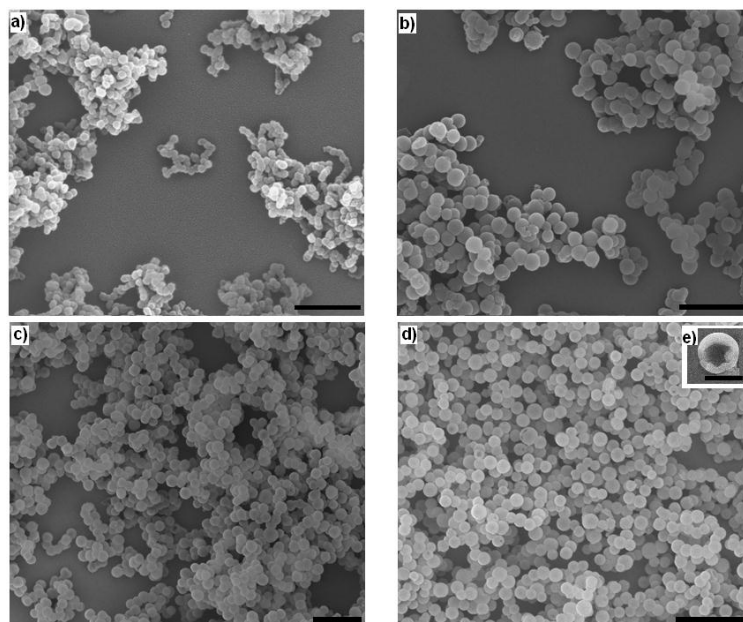

**Fig. S2.** SEM images of MSNs templated with C<sub>14-2-14</sub> from different pre-assembly time of  $t = 10$  min (a), 30 min (b), 60 min (c) and 120 min (d). The SEM image of broken HMSNs of  $t = 120$  min (e). Scale bar: 500 nm (a), 1  $\mu$ m (b and c), 2  $\mu$ m (d) and 200 nm (e).

### 2.3 XRD spectra of MSNs templated with C<sub>14-2-14</sub>

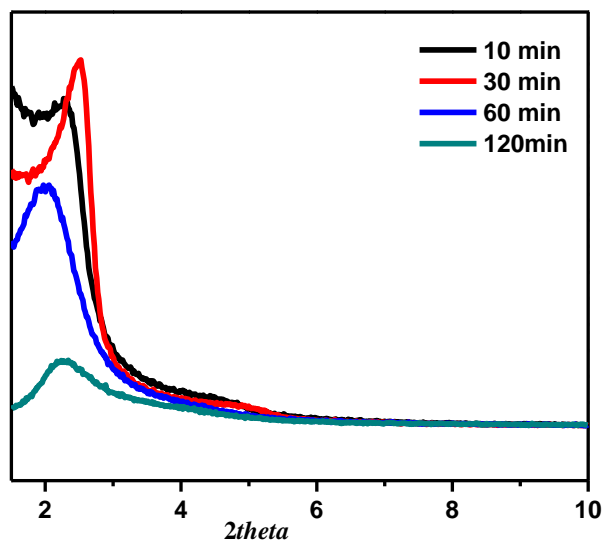

Fig. S3. XRD spectra of MSNs templated with C<sub>14-2-14</sub>.

### 2.3 Nitrogen sorption isotherms and pore size distribution of MSNs templated with C<sub>14-2-14</sub>

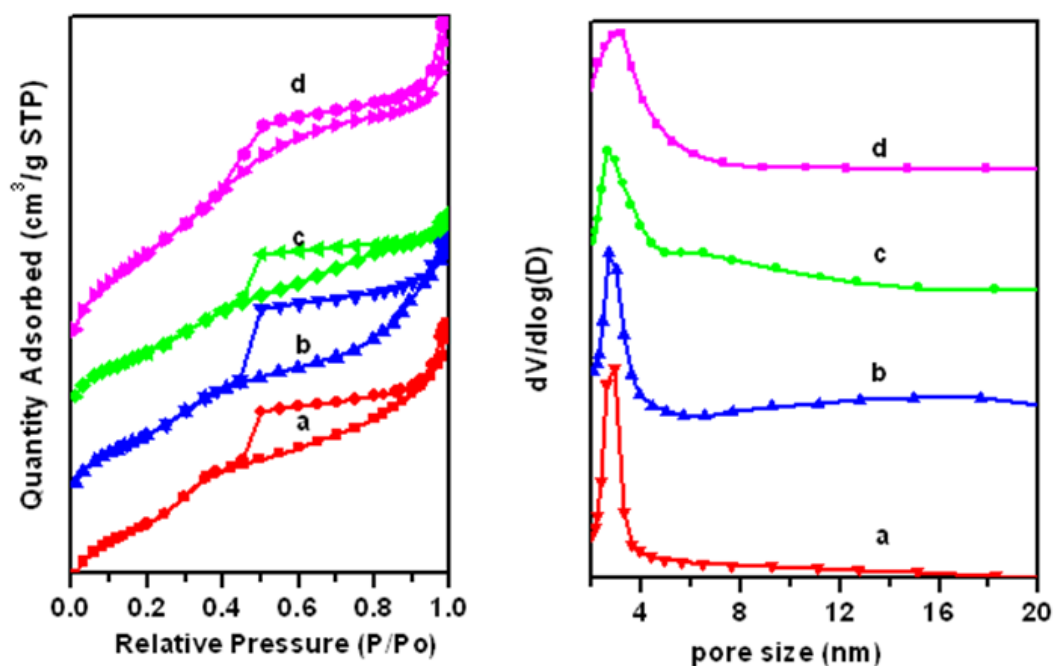

Fig. S4. Nitrogen adsorption isotherms (left) and Barrett-Joyner-Halenda (BJH) pore size distribution (right) of HMSNs templated with C<sub>14-2-14</sub> from different pre-assembly time of  $t = 10$  min (a), 30 min (b), 60 min (c) and 120 min (d).

### 3. Characterization of HMSNs templated with C<sub>14-2-10</sub>

#### 3.1 SEM and TEM images of HMSNs templated with C<sub>14-2-10</sub>

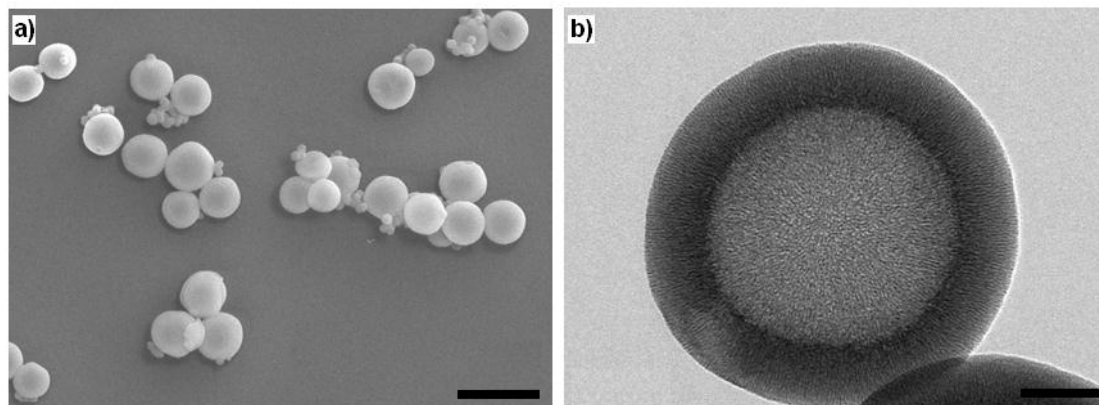

**Fig. S5.** SEM (a) and TEM (b) images of HMSNs templated with C<sub>14-2-10</sub>. Scale bar: 500 nm (a), 50nm(b).

#### 3.2 XRD spectrum of HMSNs templated with C<sub>14-2-10</sub>

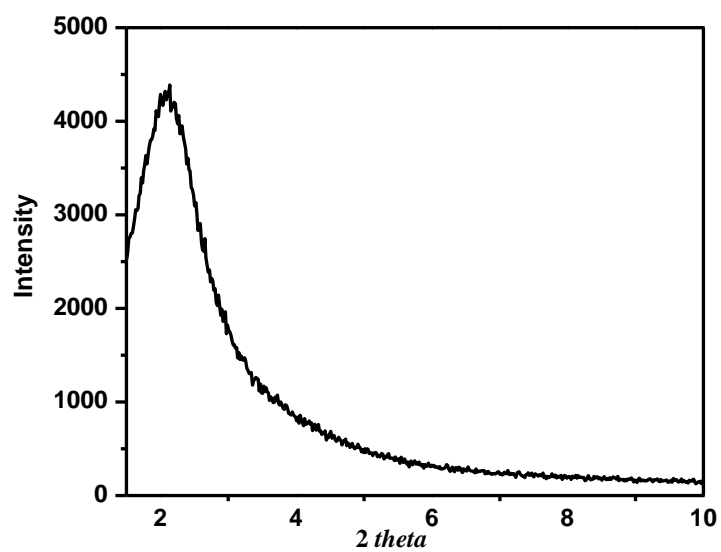

**Fig. S6.** XRD spectrum of HMSNs templated with C<sub>14-2-10</sub>

### 3.3 Nitrogen sorption isotherms and pore size distribution of HMSNs templated with $C_{14-2-10}$

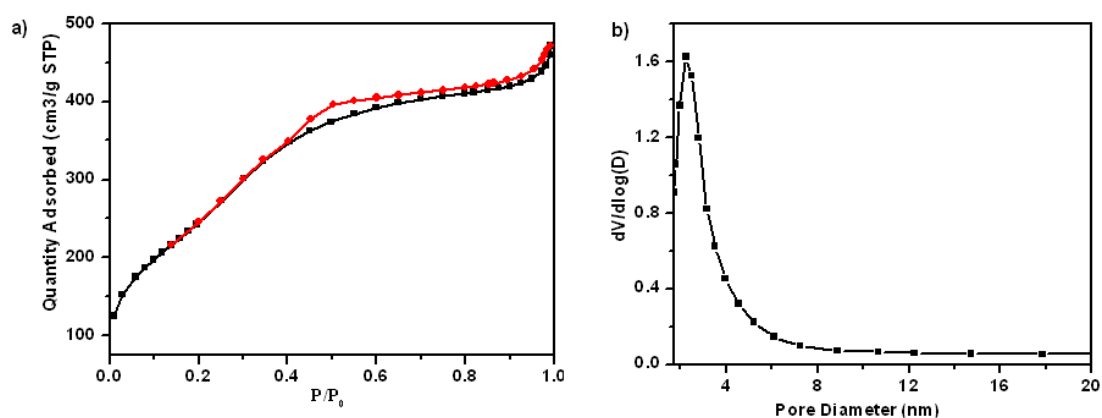

**Fig. S7.** Nitrogen adsorption isotherm (a) and BJH pore size distribution (b) of HMSNs templated with  $C_{14-2-10}$ .

## 4. Characterization of HMSNs templated with $C_{16-2-16}$

### 4.1 SEM and TEM images of HMSNs templated with $C_{16-2-16}$

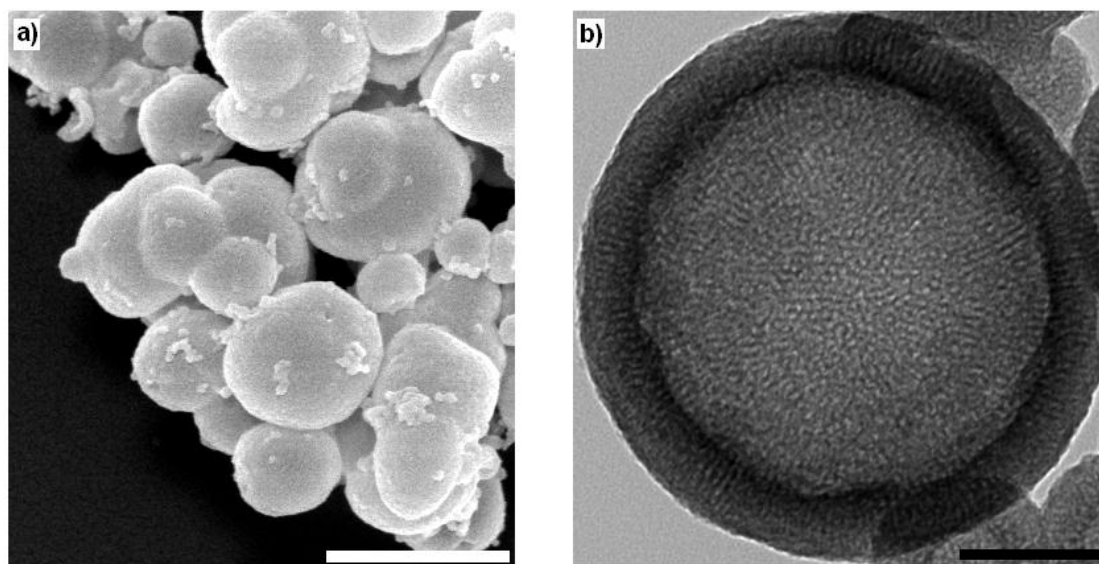

**Fig. S8.** SEM (a) and TEM (b) images of HMSNs templated with  $C_{16-2-16}$ . Scale bar: 500 nm (a), 100nm (b).

#### 4.2 XRD spectrum of HMSNs templated with C<sub>16-2-16</sub>

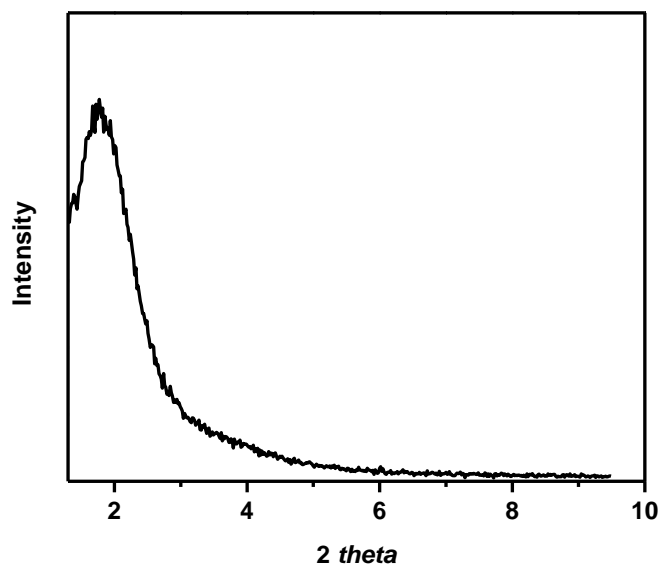

Fig. S9. XRD spectrum of HMSNs templated with C<sub>16-2-16</sub>

#### 4.3 Nitrogen sorption isotherms and pore size distribution of HMSNs templated with C<sub>16-2-16</sub>

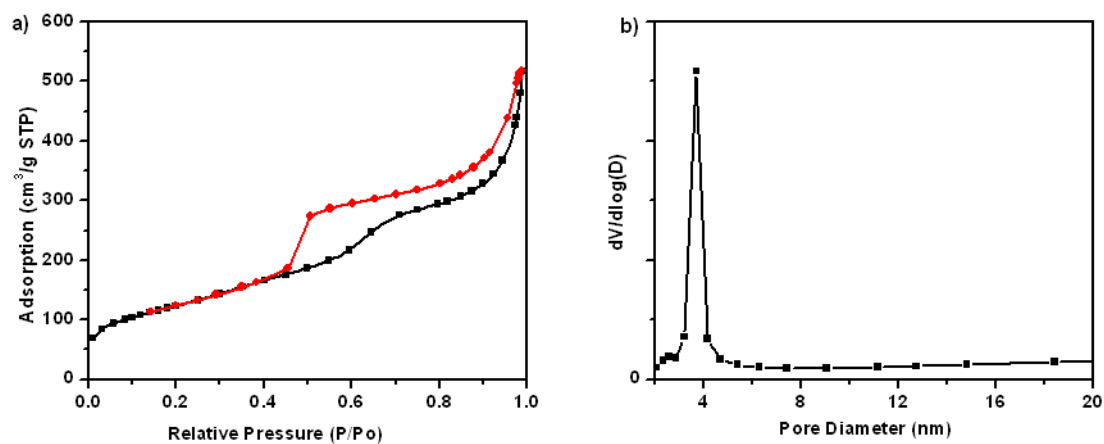

Fig. S10. Nitrogen adsorption isotherm (a) and BJH pore size distribution (b) of HMSNs templated with C<sub>16-2-16</sub>.

#### Reference

[S1] R. Oda, I. Huc, S. J. Candau, *Chem. Commun.* **1997**, 2105.
